# Supplementary figures and images for: Factors Predictive of Primary Resistance to Immune Checkpoint Inhibitors in Patients with Advanced Non-Small Cell Lung Cancer
Source: MDPI journal article supplement (doi:10.3390/cancers15102733), 2023-05-12

# Overall survival

Strata — No Primary Resistance — Primary Resistance

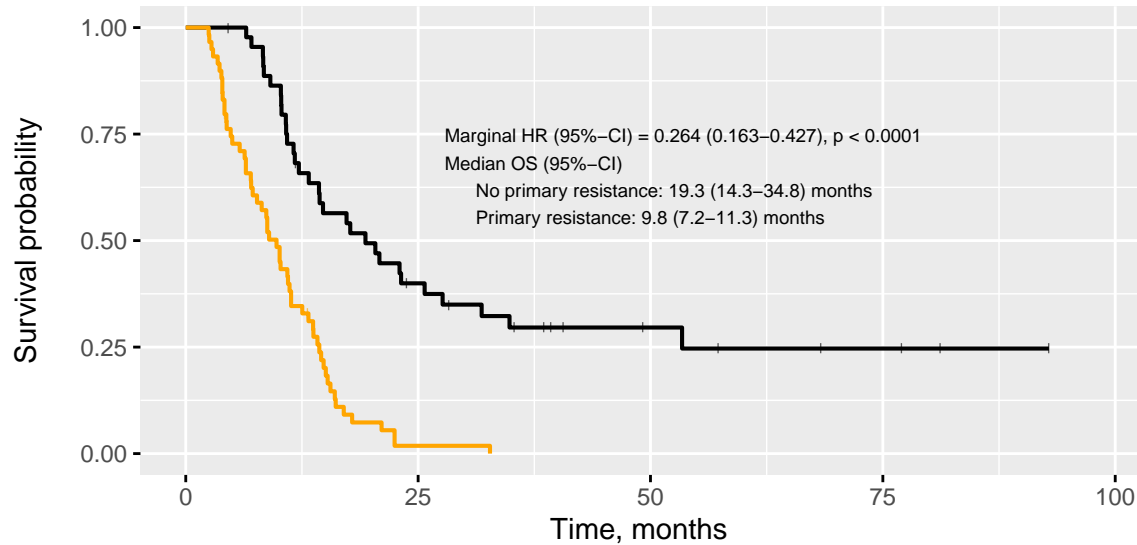

## Number at risk

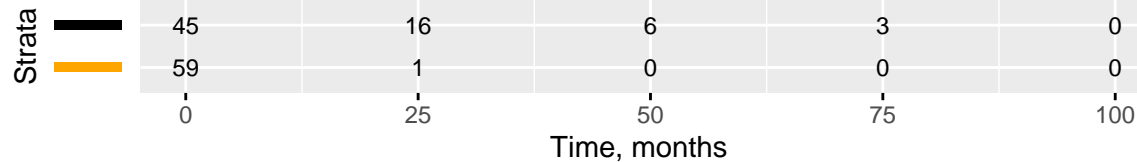

Supplement: s1 [file s1]
